# Supplementary material for: Monitoring protein distributions based on patterns generated by protein adsorption behavior in a microfluidic channel
Source: Royal Society of Chemistry journal article supplement (doi:10.1039/c1lc20680j), 2011-01-01
Supplement: c1lc20680j.pdf [file c1lc20680j.pdf]

**SPR angle shift [mDeg]**

|                 | <b>Surface 1</b> | <b>Surface 2</b> | <b>Surface 3</b> | <b>Surface 4</b> | <b>Surface 5</b> | <b>Surface 6</b> | <b>Surface 7</b> | <b>Surface 8</b> |
|-----------------|------------------|------------------|------------------|------------------|------------------|------------------|------------------|------------------|
| <b>Sample 1</b> | 53               | 34               | 11               | 10               | 17               | 7                | 4                | 11               |
|                 | 54               | 33               | 12               | 9                | 9                | 3                | 6                | 6                |
|                 | 51               | 30               | 10               | 9                | 10               | 6                | 4                | 7                |
|                 | 50               | 29               | 11               | 8                | 15               | 4                | 6                | 9                |
|                 | 49               | 34               | 16               | 7                | 14               | 5                | 8                | 10               |
|                 | 47               | 35               | 11               | 9                | 13               | 6                | 10               | 11               |
| <b>Sample 2</b> | 60               | 39               | 4                | 9                | 12               | 9                | 7                | 11               |
|                 | 66               | 40               | 6                | 20               | 7                | 8                | 6                | 14               |
|                 | 70               | 42               | 5                | 15               | 16               | 8                | 7                | 13               |
|                 | 75               | 46               | 6                | 16               | 14               | 7                | 9                | 16               |
|                 | 59               | 30               | 9                | 18               | 15               | 6                | 10               | 15               |
|                 | 58               | 40               | 10               | 19               | 12               | 8                | 9                | 14               |
| <b>Sample 3</b> | 151              | 50               | 16               | 12               | 31               | 14               | 16               | 22               |
|                 | 144              | 66               | 20               | 8                | 30               | 17               | 18               | 21               |
|                 | 148              | 60               | 18               | 15               | 28               | 15               | 20               | 20               |
|                 | 159              | 60               | 16               | 12               | 24               | 16               | 18               | 19               |
|                 | 160              | 62               | 14               | 10               | 26               | 17               | 14               | 25               |
|                 | 162              | 64               | 15               | 6                | 27               | 15               | 15               | 24               |
| <b>Sample 4</b> | 68               | 29               | 8                | 7                | 10               | 5                | 5                | 11               |
|                 | 60               | 29               | 6                | 16               | 8                | 8                | 4                | 13               |
|                 | 62               | 31               | 4                | 8                | 9                | 6                | 5                | 15               |
|                 | 65               | 30               | 5                | 10               | 10               | 7                | 6                | 14               |
|                 | 67               | 26               | 6                | 16               | 12               | 4                | 7                | 13               |
|                 | 70               | 25               | 8                | 15               | 13               | 5                | 5                | 14               |
| <b>Sample 5</b> | 52               | 19               | 5                | 7                | 12               | 2                | 3                | 5                |
|                 | 49               | 22               | 9                | 4                | 4                | 5                | 5                | 6                |
|                 | 50               | 15               | 8                | 8                | 10               | 6                | 6                | 5                |
|                 | 48               | 16               | 6                | 7                | 5                | 4                | 4                | 4                |
|                 | 47               | 18               | 7                | 5                | 6                | 3                | 3                | 3                |
|                 | 50               | 19               | 5                | 6                | 8                | 5                | 2                | 2                |

|                 | <b>SPR angle shift [mDeg]</b> |                  |                  |                  |
|-----------------|-------------------------------|------------------|------------------|------------------|
|                 | <b>Surface 1</b>              | <b>Surface 2</b> | <b>Surface 3</b> | <b>Surface 4</b> |
| <b>Sample 6</b> | 53                            | 34               | 11               | 10               |
|                 | 54                            | 33               | 12               | 9                |
|                 | 51                            | 30               | 10               | 9                |
|                 | 50                            | 29               | 11               | 8                |
|                 | 49                            | 34               | 16               | 7                |
|                 | 47                            | 35               | 11               | 9                |
| <b>Sample 7</b> | 68                            | 29               | 16               | 7                |
|                 | 60                            | 29               | 6                | 16               |
|                 | 62                            | 31               | 4                | 8                |
|                 | 65                            | 30               | 5                | 10               |
|                 | 67                            | 26               | 6                | 16               |
|                 | 70                            | 25               | 8                | 15               |
| <b>Sample 8</b> | 46                            | 15               | 4                | 8                |
|                 | 53                            | 15               | 5                | 4                |
|                 | 45                            | 14               | 4                | 5                |
|                 | 39                            | 16               | 3                | 7                |
|                 | 42                            | 14               | 6                | 5                |
|                 | 40                            | 17               | 2                | 6                |
| <b>Sample 9</b> | 49                            | 20               | 6                | 8                |
|                 | 47                            | 18               | 10               | 5                |
|                 | 43                            | 16               | 10               | 8                |
|                 | 52                            | 19               | 6                | 6                |
|                 | 53                            | 18               | 8                | 8                |
|                 | 51                            | 21               | 6                | 6                |
